# Supplementary material for: Iridium Complex Catalyzed Hydrogen Production from Glucose and Various Monosaccharides
Source: MDPI journal article supplement (doi:10.3390/catal11080891), 2021-07-23

Supporting Information

# Iridium Complex Catalyzed Hydrogen Production from Glucose and Various Monosaccharides

Ken-ichi Fujita \*, Takayoshi Inoue, Toshiki Tanaka, Jaeyoung Jeong, Shohichi Furukawa and Ryohei Yamaguchi

Graduate School of Human and Environmental Studies, Kyoto University, Kyoto 606-8501, Japan; inoue.takayoshi.e66@kyoto-u.jp (T.I.); tanaka.toshiki.a82@kyoto-u.jp (T.T.); jeong.jaeyoung.44a@st.kyoto-u.ac.jp (J.J.); furukawa.shohichi.37z@st.kyoto-u.ac.jp (S.F.); yamaguchi.ryohei.75s@st.kyoto-u.ac.jp (R.Y.)

\* Correspondence: fujita.kenichi.6a@kyoto-u.ac.jp; Tel.: +81-75-753-6827

## Contents

**Figure S1.** The reaction setup for hydrogen production from glucose and various monosaccharides. S2

**Figure S2.** GC analysis of the evolved gas by the reaction of glucose under optimal conditions catalyzed by catalyst 2. S2

NMR spectra of the organic product shown in Equation 1. S3

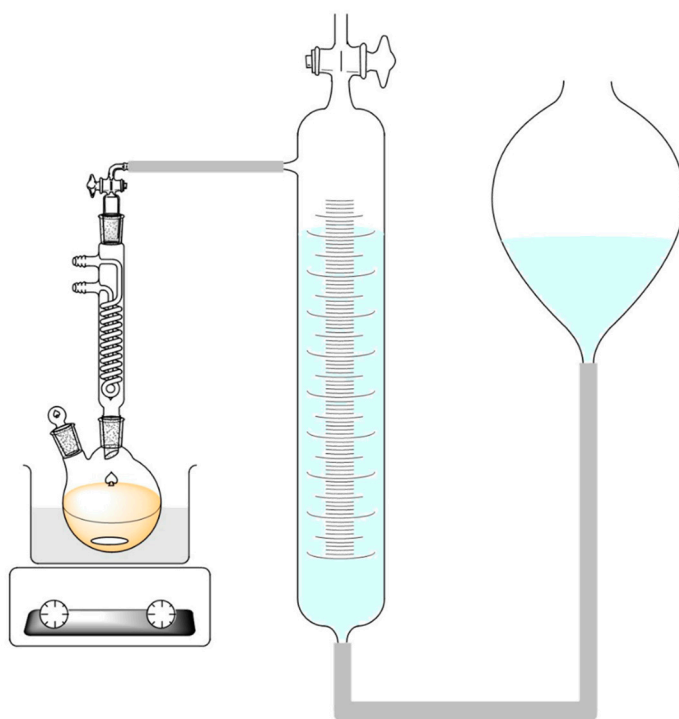

**Figure S1.** The reaction setup for hydrogen production from glucose and various monosaccharides.

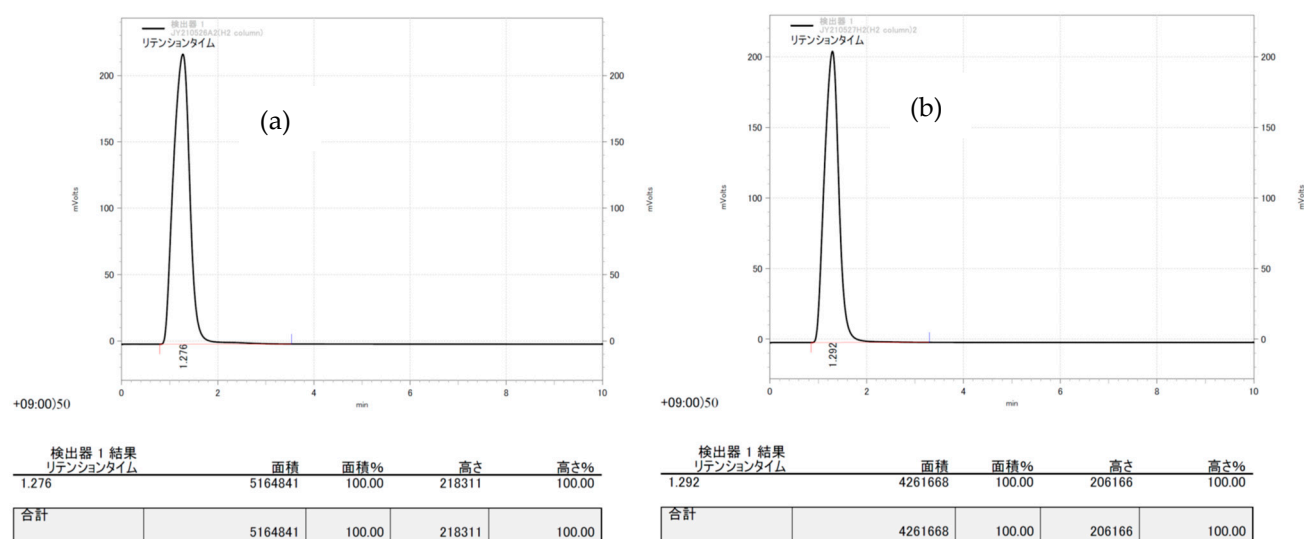

**Figure S2.** GC analysis of the evolved gas by the reaction of glucose under optimal conditions catalyzed by catalyst 2. **(a)** The chromatogram of the evolved gas by the reaction catalyzed by catalyst 2. **(b)** The chromatogram of the standard hydrogen gas.

$^1\text{H}$  NMR spectrum of the organic product in Equation 1.

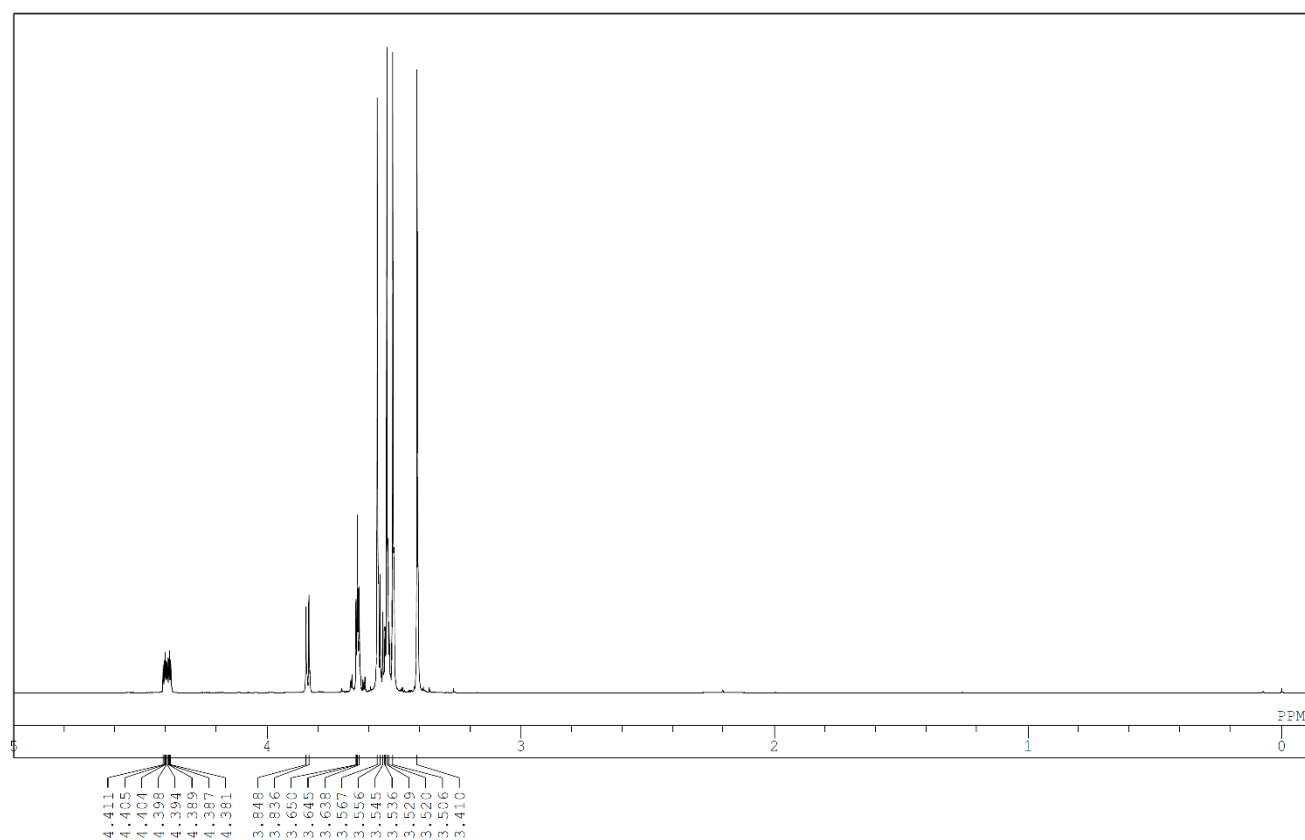

$^{13}\text{C}\{^1\text{H}\}$  NMR spectrum of the organic product in Equation 1.

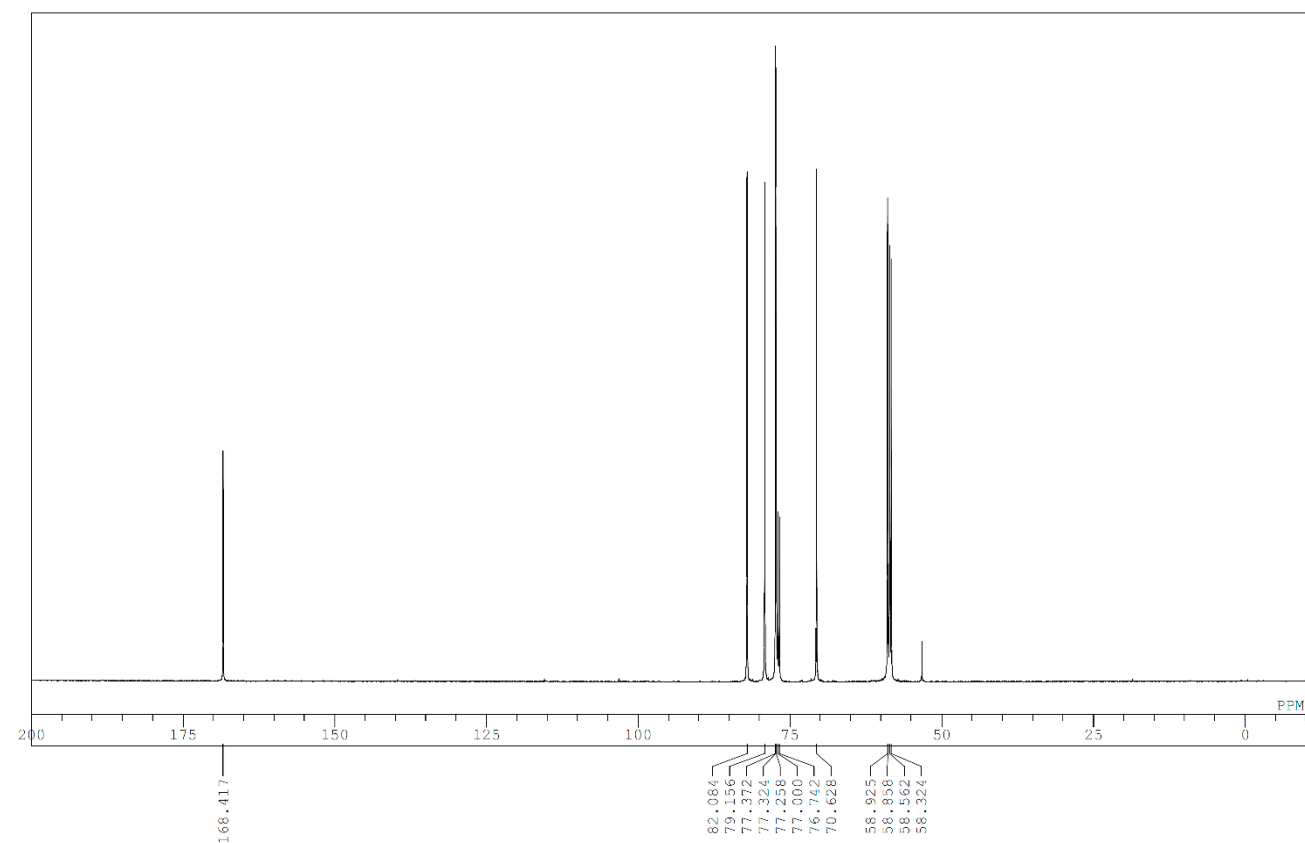

Supplement: s1 [file s1]
